# Supplementary material for: Strain-engineering induced topological phase transitions and multiple valley states in Janus monolayer VCSiN4
Source: Royal Society of Chemistry journal article supplement (doi:10.1039/d3tc01369c), 2023-01-01
Supplement: d3tc01369c1.pdf [file d3tc01369c1.pdf]

## Supplemental Materials for “Strain-engineering induced topological phase transitions and multiple valley states in Janus monolayer VCSiN<sub>4</sub>”

Kang Jia<sup>1</sup>, Xiao-Jing Dong<sup>1</sup>, Sheng-Shi Li<sup>2</sup>, Wei-Xiao Ji<sup>2</sup>, and Chang-Wen Zhang<sup>1,2\*</sup>

1. School of Physics and Physical Engineering, Qufu Normal University, Qufu, Shandong, 273100, PRC
2. School of Physics and Technology, Institute of Spintronics, University of Jinan, Jinan, Shandong, 250022, PRC

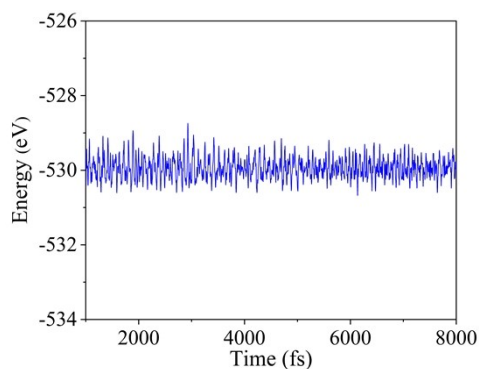

**Fig. S1** The AIMD simulation of VCSiN<sub>4</sub> at 300 K.

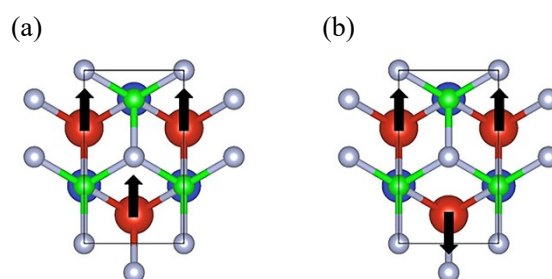

**Fig. S2** The considered magnetic configurations: panel (a) is for the FM configuration, and panel (b) is for the AFM configuration.

**Table S1** The equilibrium lattice constants ( $a$ ), space group, crystal symmetry, magnetic ground state, and formation energy of monolayers VC<sub>2</sub>N<sub>4</sub>, VCSiN<sub>4</sub>, and VSi<sub>2</sub>N<sub>4</sub>.

|                       | VC <sub>2</sub> N <sub>4</sub> | VCSiN <sub>4</sub> | VSi <sub>2</sub> N <sub>4</sub> |
|-----------------------|--------------------------------|--------------------|---------------------------------|
| $a$ (Å)               | 2.57                           | 2.77               | 2.89                            |
| space group           | $P6m2$                         | $P3m1$             | $P6m2$                          |
| crystal symmetry      | $D_{3h}$                       | $C_{3v}$           | $D_{3h}$                        |
| magnetic ground state | FM                             | FM                 | FM                              |
| formation energy (eV) | 2.63                           | 3.10               | 3.81                            |

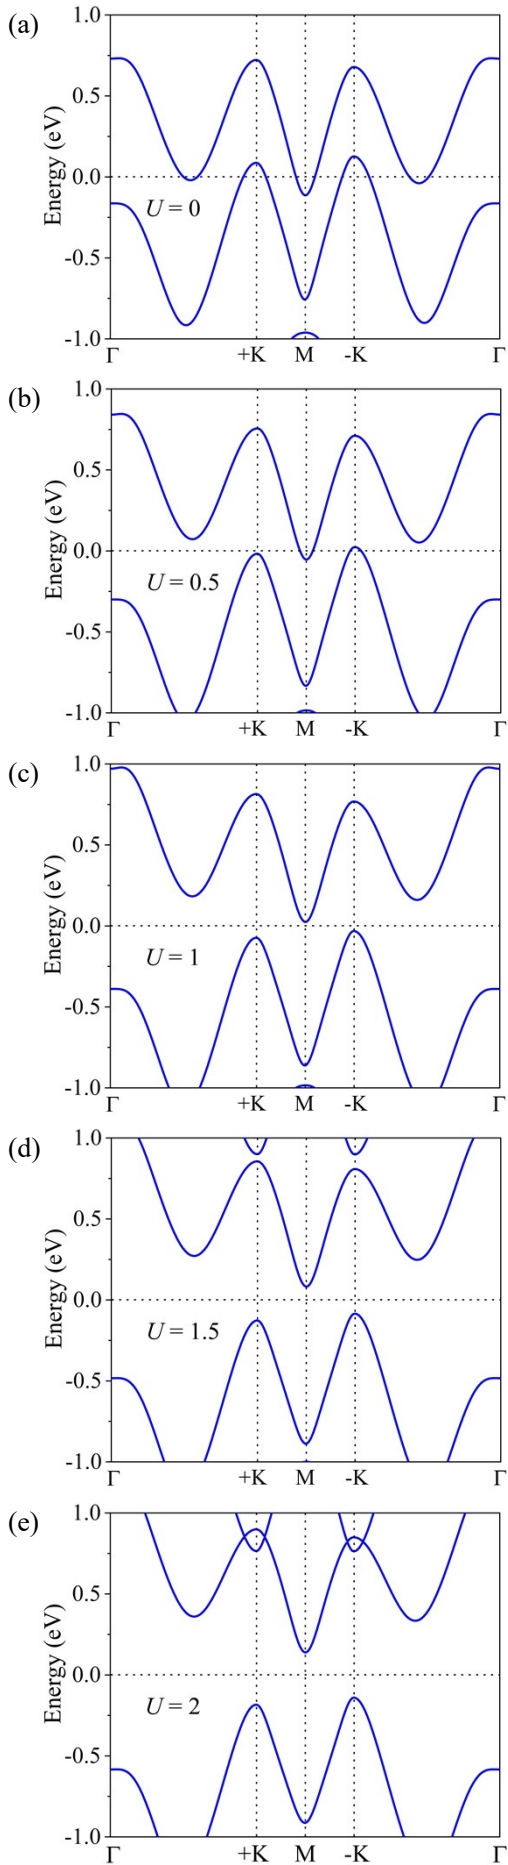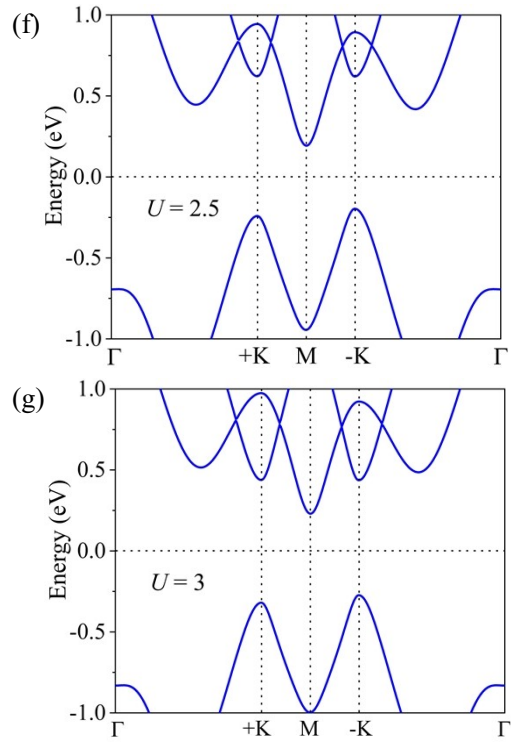

**Fig. S3** The electronic band structures by using GGA+ $U$  method with OOP magnetic anisotropy ( $U$  values vary from 0 to 3 eV).

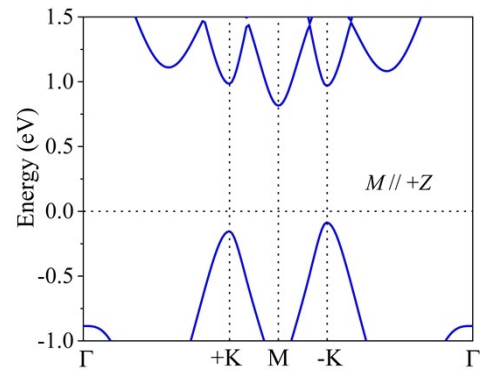

**Fig. S4** The electronic band structures by using HSE06+SOC with OOP magnetic anisotropy.

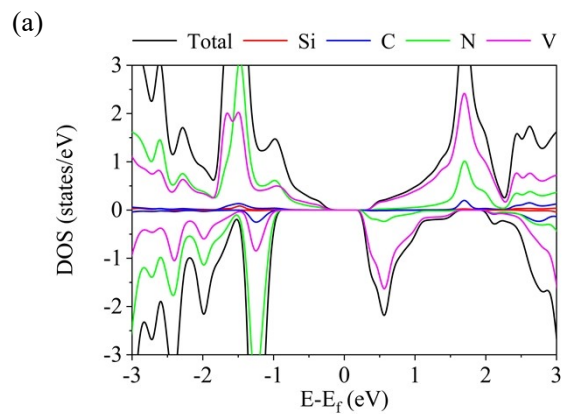

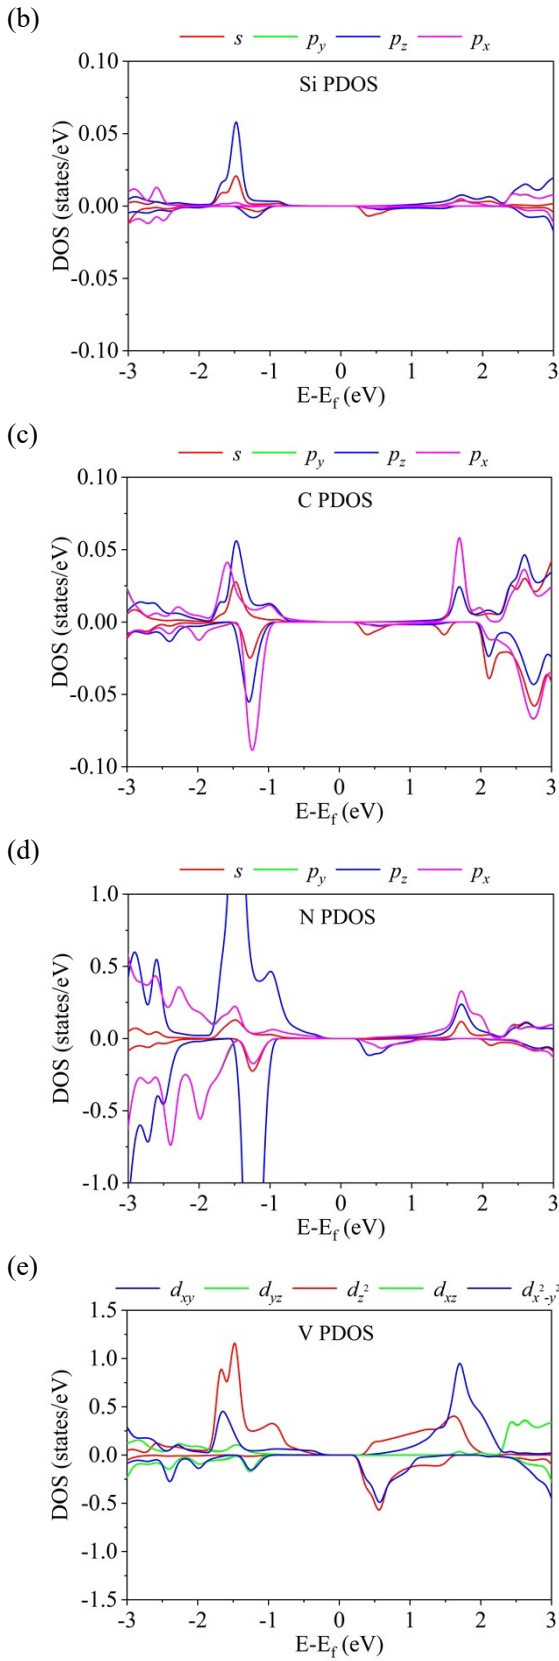

**Fig. S5** (a) The total density of states (DOS) of the VCSiN<sub>4</sub>. (b) The partial density of states (PDOS) of Si atoms. (c) The PDOS of C atoms. (d) The PDOS of N atoms. (e) The PDOS of V atoms.

The total and partial density of states (DOS) of the VCSiN<sub>4</sub> are calculated. As is exhibited in Fig. S5, we can observe that both CBM and VBM are mainly composed of  $d_{x^2-y^2}/d_{xy}$  orbitals of V atoms and minority  $p_x/p_z$  orbitals of N atoms, which is consistent with that of orbital-resolved electronic band structure (see Fig. 3).

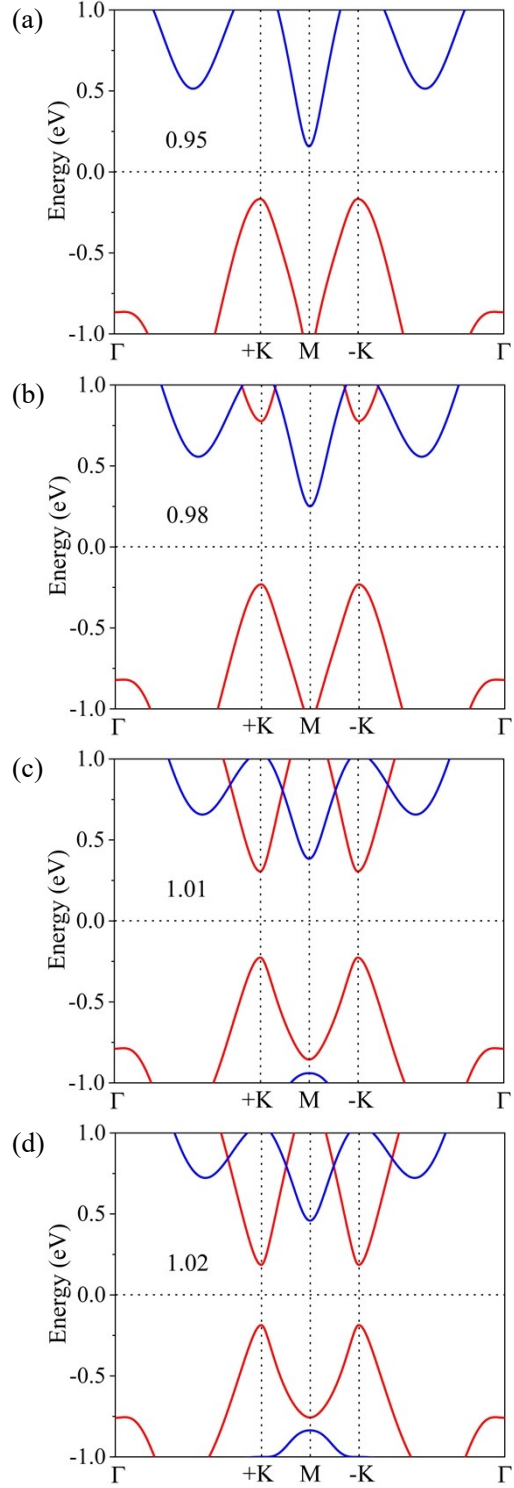

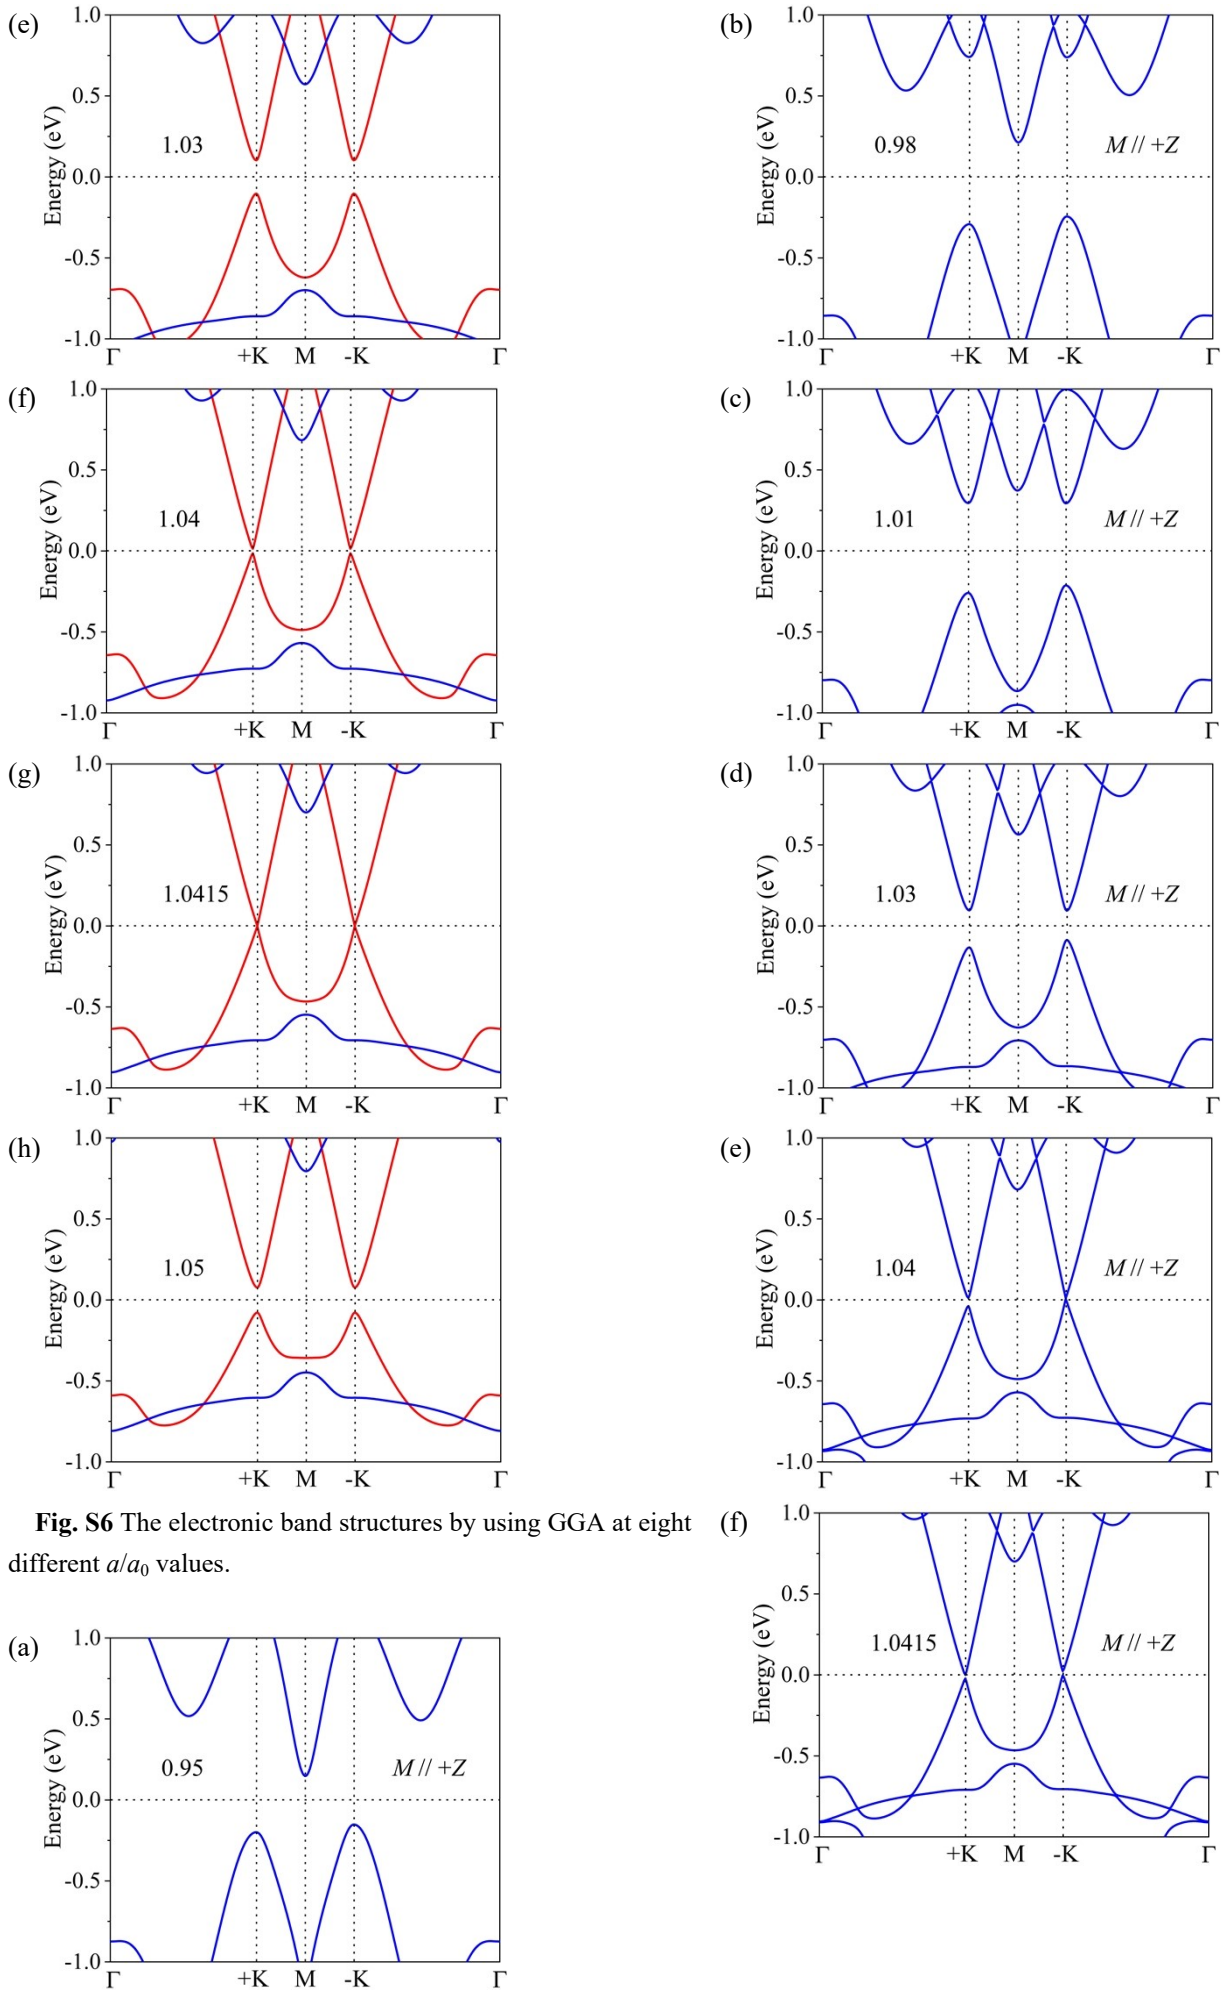

**Fig. S6** The electronic band structures by using GGA at eight different  $a/a_0$  values.

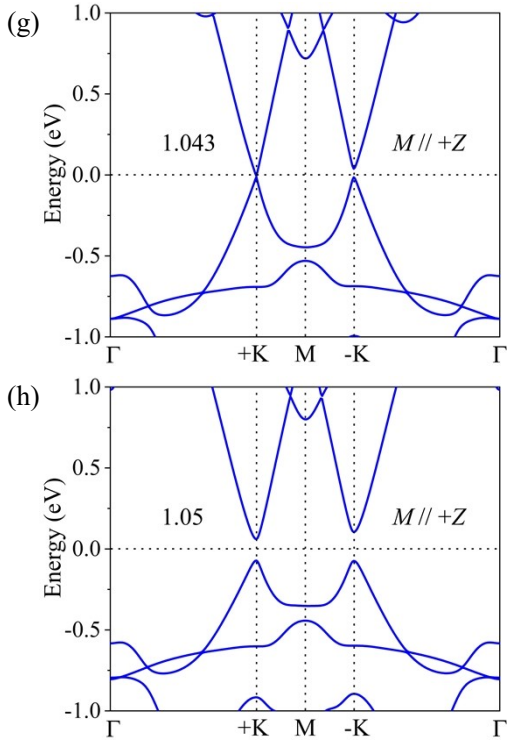

**Fig. S7** The electronic band structures by using GGA+SOC with OOP magnetic anisotropy at eight different  $a/a_0$  values.

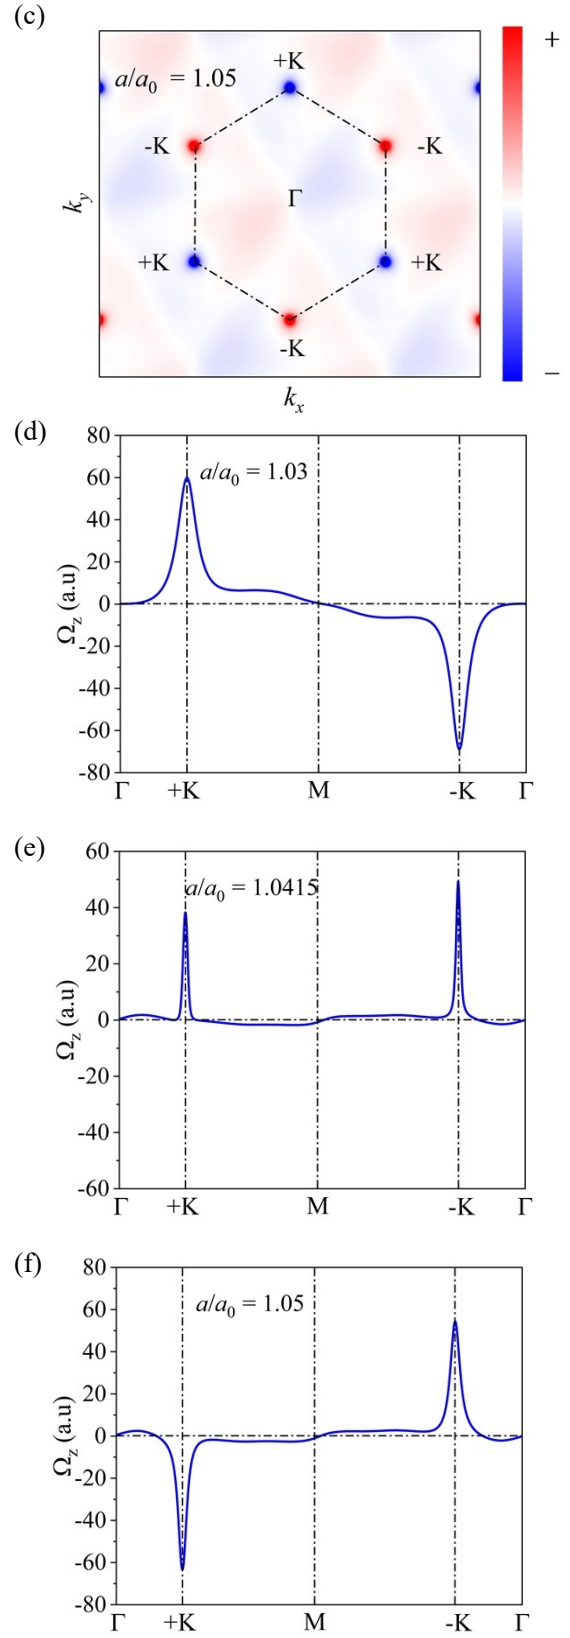

**Fig. S8** The Berry curvature in the 2D BZ with (a)  $a/a_0 = 1.03$ , (b)  $a/a_0 = 1.0415$ , and (c)  $a/a_0 = 1.05$ . The Berry curvature along the high symmetry points with (d)  $a/a_0 = 1.03$ , (e)  $a/a_0 = 1.0415$ , and (f)  $a/a_0 = 1.05$ .

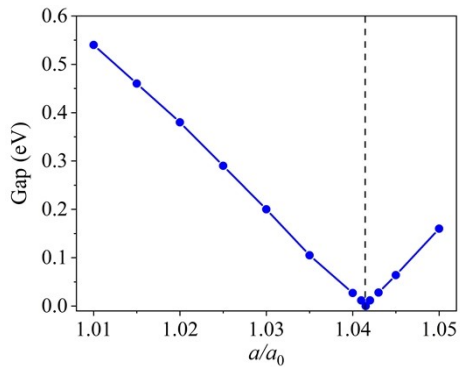

**Fig. S9** The global band gaps with SOC (IP magnetic anisotropy) as a function of  $a/a_0$ .

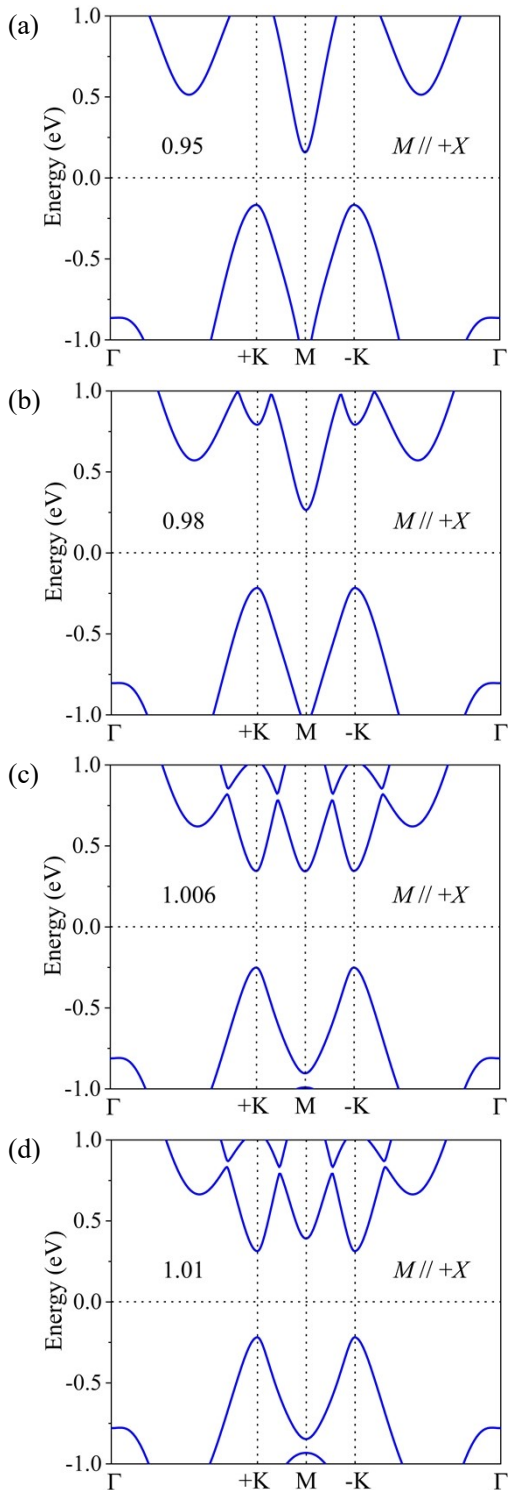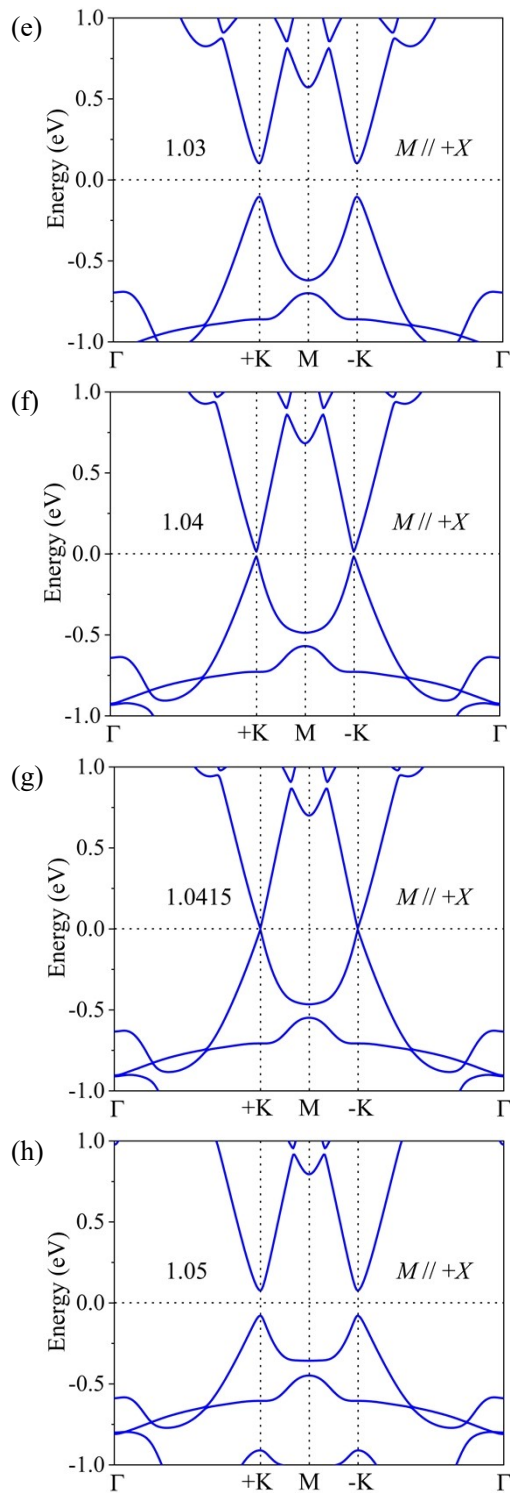

**Fig. S10** The electronic band structures by using GGA+SOC with IP magnetic anisotropy at eight different  $a/a_0$  values.
